# Supplementary material for: In situ formed polymer gel electrolytes for lithium batteries with inherent thermal shutdown safety features
Source: Royal Society of Chemistry journal article supplement (doi:10.1039/c9ta02341k), 2019-01-01
Supplement: c9ta02341k1.pdf [file c9ta02341k1.pdf]

## Electronic Supplementary Information

### **In-situ formed polymer gel electrolytes for lithium batteries with inherent thermal shutdown safety features**

Hongyao Zhou, Haodong Liu, Yejing Li, Xiujun Yue, Xuefeng Wang, Matthew Gonzalez, Ying Shirley Meng, and Ping Liu\*

Department of Nanoengineering, University of California San Diego, 9500 Gilman Drive, La Jolla, CA 92093, United States

E-mail: [piliu@eng.ucsd.edu](mailto:piliu@eng.ucsd.edu)

## Experimental

*Preparation of  $\text{Li}_4\text{Ti}_5\text{O}_{12}$  (LTO) cathode:* LTO powder (Nanomyte B-10 supplied from NEI, U.S.) was mixed with polyvinylidene difluoride (PVDF) and carbon black (Super P) in a weight ratio of 80:10:10. The loading density of LTO was  $0.9 \text{ mg cm}^{-2}$ . For the thermal shutdown test, LTO, polyvinyl alcohol (PVA) and Super P were mixed in a weight ratio of 70:15:15 to enhance the wettability of the gel electrolyte. The loading density of LTO was  $2.1 \text{ mg cm}^{-2}$ .

*Gel Permeation Chromatography (GPC):* GPC system consist of: a pump (Shimadzu, Japan); 2 in-line  $5 \mu\text{m}$  size-exclusion columns ( $10^3$  and  $10^4 \text{ \AA}$ , Phenogel, Phenomenex, U.S.) within a column oven (Shimadzu); and a RID-10A differential refractive index detector (Shimadzu). The mobile phase consists of 0.1% LiBr in DMF at a flow rate of  $1 \text{ mL/min}$  and  $50 \text{ }^\circ\text{C}$ . The sample injection volume was  $25 \mu\text{L}$ . Peaks were calibrated against a set of polystyrene standards.

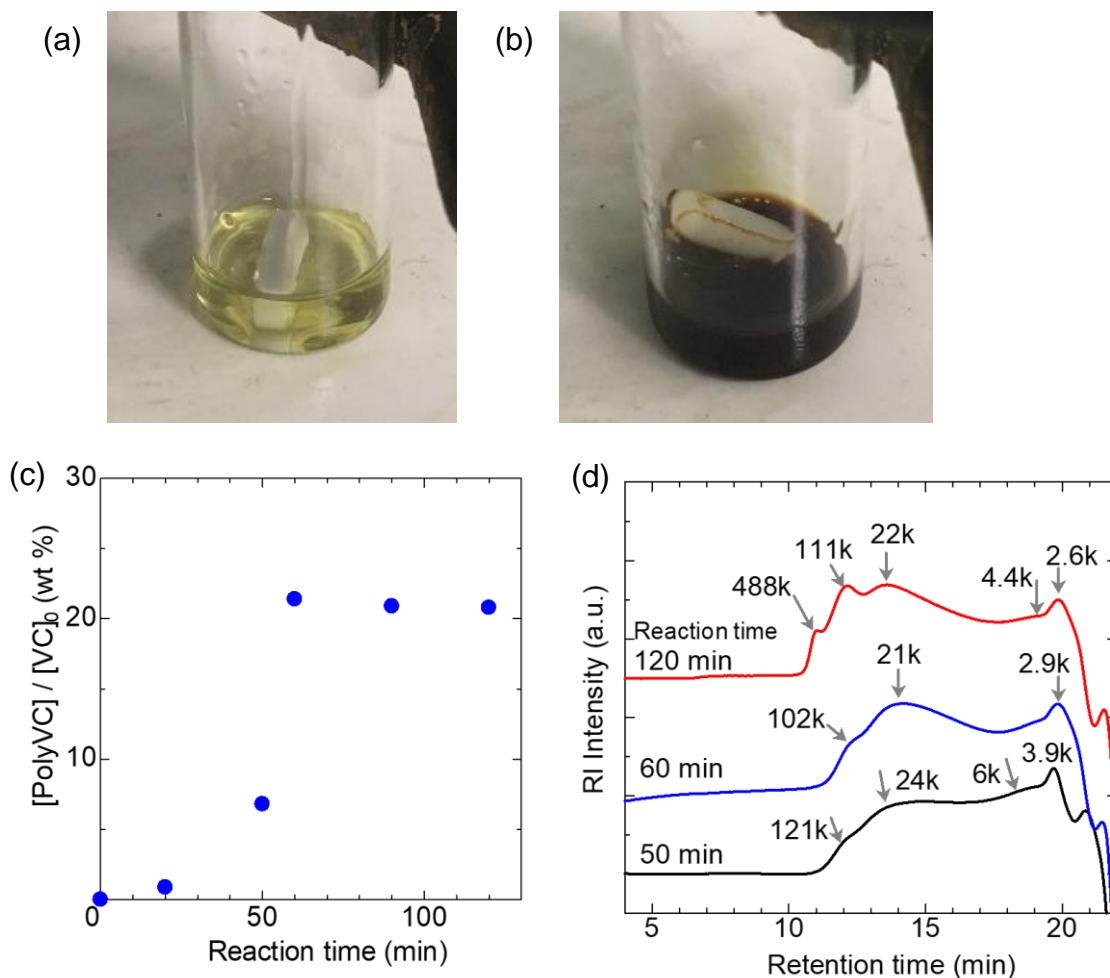

**Figure S1.** Photograph of VC-LiI ( $1 \text{ mol kg}^{-1}$ ) solution before heating (a) and after heating (b) at  $80 \text{ }^\circ\text{C}$ . (c) Weight ratio of polyVC to the initial amount of VC ( $[\text{VC}]_0 = 2 \text{ g}$ ) monomer after varied reaction time ( $T = 80 \text{ }^\circ\text{C}$ ). The polymer gel after 60 minutes of reaction is used as the electrolyte in the experiment, and the weight ratio of polyVC to solvent VC in the gel electrolyte is 1:4. (d) Reflective index (RI) intensity vs retention time of polyVC after 50 min, 60 min and 120 min of the reaction. Number-averaged molecular weight ( $M_n$ ) of the polymer at each peak is labeled in the figure. The polyVC synthesized with LiI shows a broad distribution of the  $M_n$ .

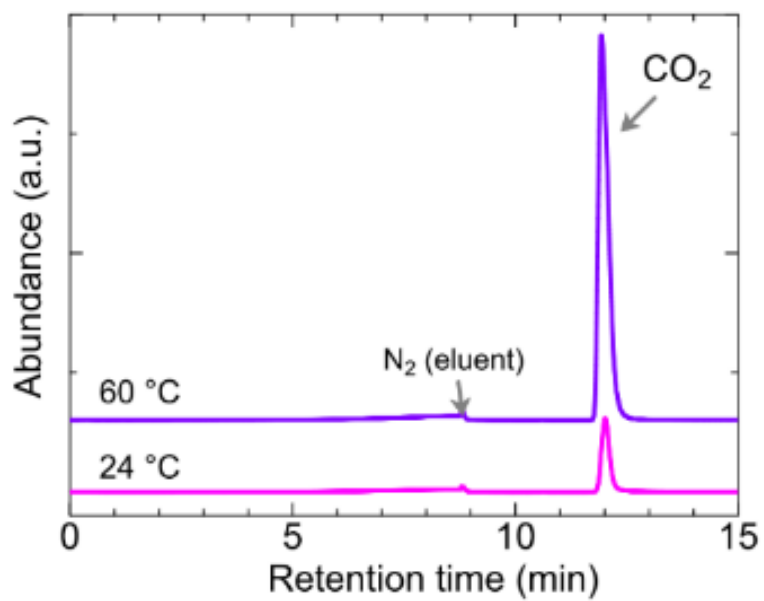

**Figure S2.** Gas chromatography of the gas generated during the polymerization of VC by LiI at 24 and 60 °C.

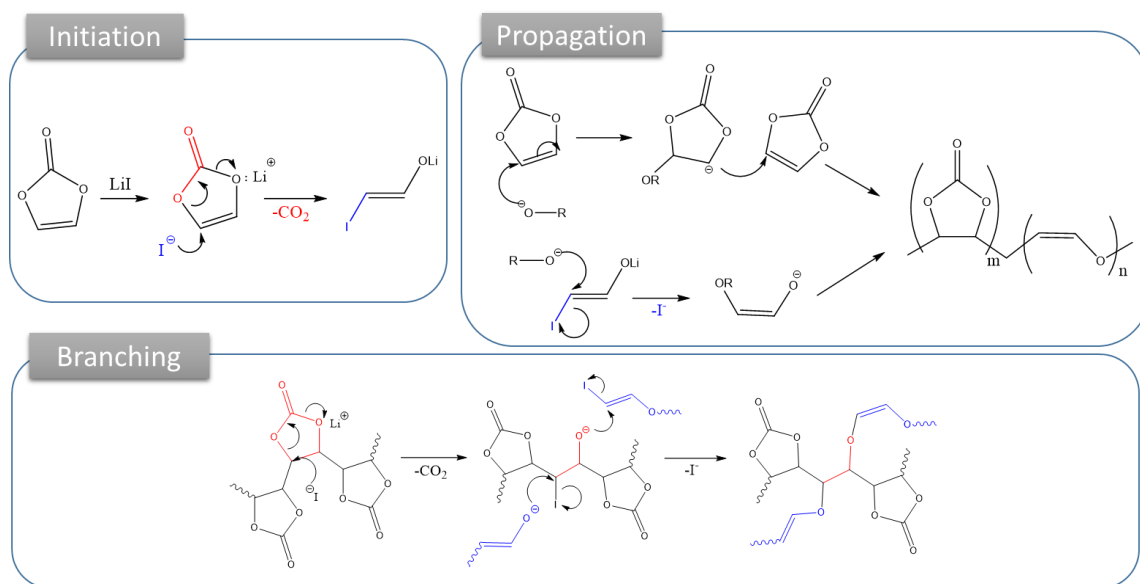

**Figure S3.** Initiation, propagation, and branching reactions of polyVC which is polymerized from VC and LiI.

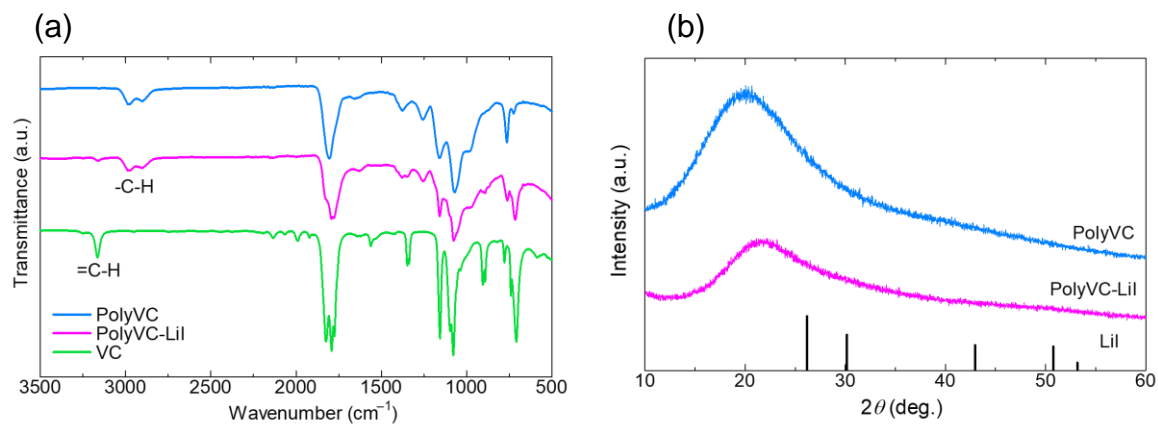

**Figure S4.** (a) IR spectrum of solidified polyVC-LiI gel electrolyte after five months of storage under Ar atmosphere, and the spectrum after removal of LiI. (b) Powder X-ray diffraction pattern of solidified polyVC-LiI electrolyte before (PolyVC-LiI)/after (PolyVC) removal of LiI. No LiI peaks are visible in the polymer gel. Diffraction pattern of LiI is cited from Inorganic Crystal Structure Database (ICSD) 414244.

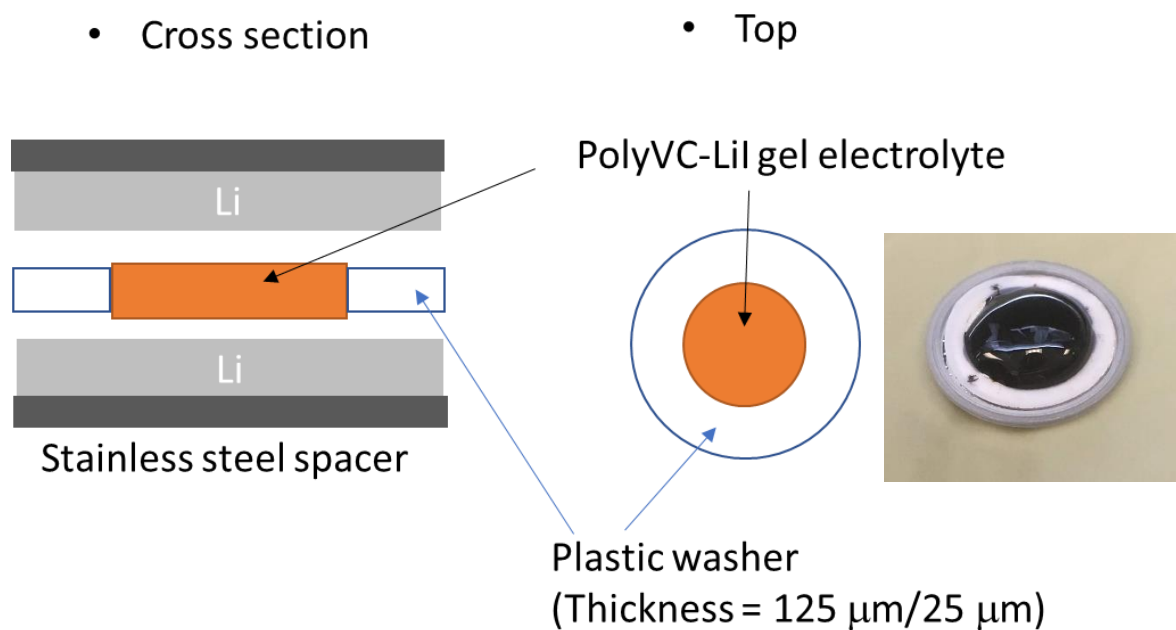

**Figure S5.** Cross section and top view of Li//Li symmetric cell. The two electrodes are separated by a plastic washer with a thickness of 125  $\mu\text{m}$  and 25  $\mu\text{m}$  (PTFE for 125  $\mu\text{m}$ , PE for 25  $\mu\text{m}$ ). The inner diameter of the washer is 12 mm. The cell is crimped into CR2016 coin cell case.

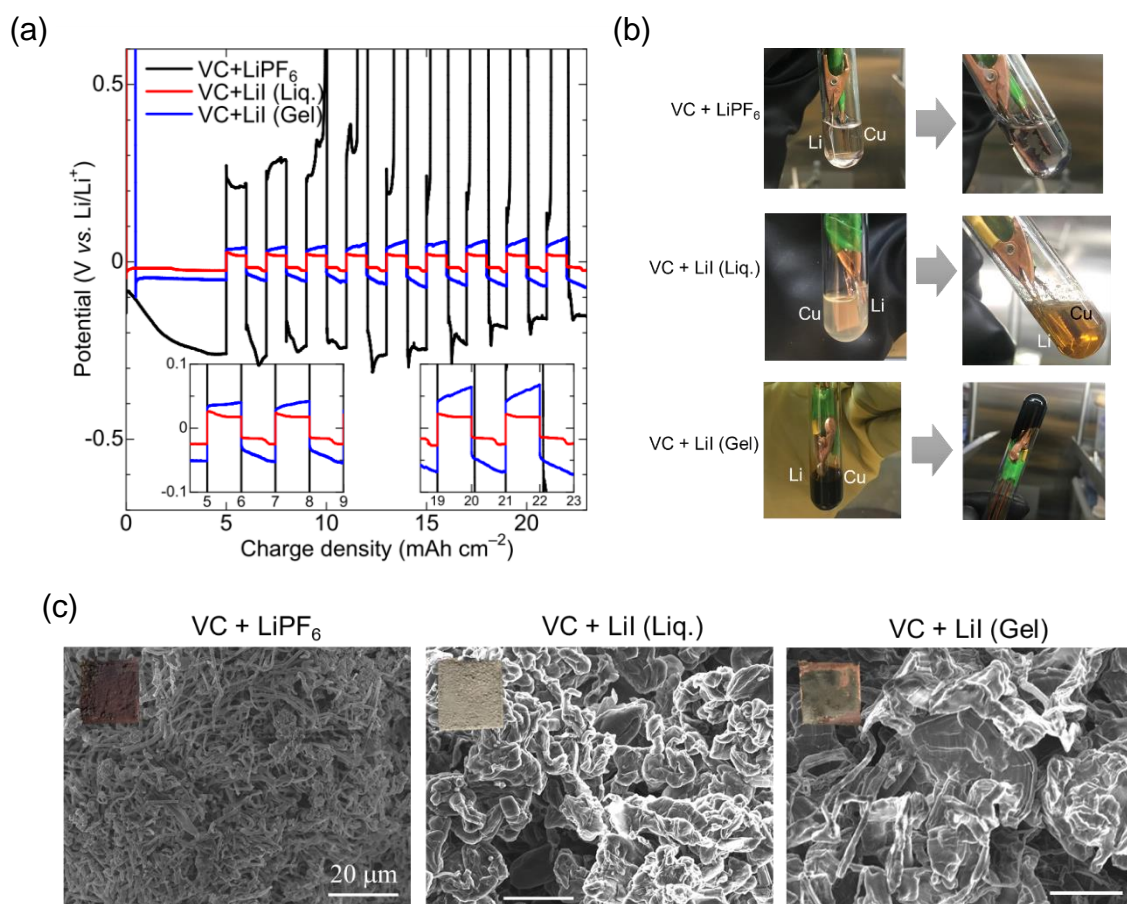

**Figure S6.** (a) Potential profile of Li//Li symmetric cycling in a test tube flooded with various VC-based electrolytes: VC + 1 mol kg<sup>-1</sup> LiPF<sub>6</sub>; VC + 1 mol kg<sup>-1</sup> LiI at liquid state; VC + 1 mol kg<sup>-1</sup> LiI at gel state. 5 mAh cm<sup>-2</sup> of Li was deposited on Cu foil and 1 mAh cm<sup>-2</sup> of Li was stripped/deposited repeatedly for 9 cycles. (b) Photo images of the state of the electrolytes before (left column) and after (right column) Li//Li cycling. (c) SEM images of the deposited Li metal on Cu foil. Scale bar = 20 μm. The inset shows the photo image of the electrodeposited Li on Cu electrode.



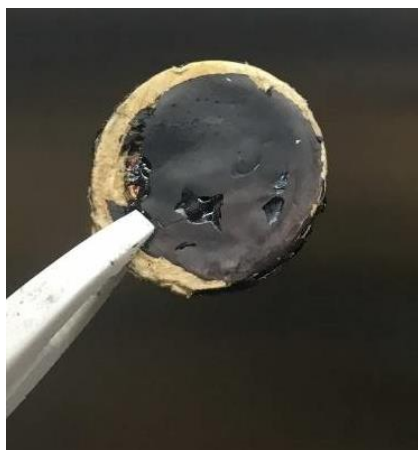

**Figure S7.** VC-based polyVC-LiI gel electrolyte after heating at 80 °C. The gel was completely solidified and covered the surface of Li metal.
